# Supplementary material for: Cardiac pathologies in mouse loss of imprinting models are due to misexpression of H19 long noncoding RNA
Source: eLife. 2021 Aug 17;10:e67250. doi: 10.7554/eLife.67250 (PMC8425947; doi:10.7554/eLife.67250)
Supplement: Figure 1—source data 1. [file elife-67250-fig1-data1.xlsx]

## Sheet: Figure 1
	H19 mRNA (panel C)						Igf2 mRNA (panel D)						IGF2 peptide
	WT	LOI		WT	LO1		WT	LOI		WT	LO1		WT	LOI		WT	LO1
	Neonate Heart			Adult Heart			Neonate Heart			Adult Heart			Neonate serum			Adult serum
	1.08	0.05		0.045	0.01		1.1	1.72		0.0244444	0.0513333		106.864	259.896		15.1245	23.3222
	1.38	0.15		0.025	0.005		0.94	2.01		0.0286667	0.0766667		127.906	295.285		17.2554	22.4514
	1.14	0.11		0.016	0.011		0.96	2.2		0.0184444	0.0644444		40.8693	528.659		1.5141	12.124
	0.71	0.2		0.034	0.014			1.96		0.0255556	0.0371111		251.288	279.025		4.2154	20.214
	0.69	0.21								0.0262222	0.0337778		256.07	334.499		10.2101	21.2154
										0.0217778			140.34	299.111		11.5212	28.4514
										0.014			210.161	378.496		5.2154	18.6255
													169.034	180.125		4.5124	14.215
													146.079	294.651		33.2154	23.2154
													193.588	205.282		14.215	3.2854
normalized average	1	0.144		0.03	0.01		1	1.9725		0.0246667	0.0526667		156.6	339.473		9.6639	19.8654
t test		0.000230421			0.0214956			0.000545554			0.00965456			0.0220302			0.0229863
fold change		6.94444			3			1.9725			2.13514			2.16777			2.05563
