# Supplementary material for: Cardiac pathologies in mouse loss of imprinting models are due to misexpression of H19 long noncoding RNA
Source: eLife. 2021 Aug 17;10:e67250. doi: 10.7554/eLife.67250 (PMC8425947; doi:10.7554/eLife.67250)
Supplement: Figure 2—source data 1. [file elife-67250-fig2-data1.xlsx]

## Sheet: 2C
	Figure 2C: % KI-67 Positive Nuclei
	WT	LOI	LOI+BAC
	25.3731	51.2821	45.6376
	28.1818	33.1633	33.7278
	10.3896	29.2453	44.0367
	30.597	31.746	20.6349
	14.2857	36.8	36.5591
average	21.7655	36.4473	36.1192
t-test to WT		0.0301002	0.0433028
t-test to LOI	0.0301002		0.957253

## Sheet: 2D Fig Supp 1A
	Figure 2D or Figure 2-figure supplement 1A
	Ki-67		Cyclin EI		Cyclin D1		p-AKT		t-AKT		p-S6K1		t-S6K1
	WT	LOI	WT	LOI	WT	LOI	WT	LOI	WT	LOI	WT	LOI	WT	LOI
	0.87	2.42	0.86	4.39	1.09	3.66	1.09	1.66	0.98	1	1.07	5.83	1.07	1.17
	1.13	2.7	1.14	4.63	0.91	3.85	0.91	1.61	1.02	0.99	0.93	6.58	0.93	1.22
	0.95	2.69	1.09	2.61	0.59	3.05	0.86	1.66	0.98	0.98	1.18	6.28	1.02	0.94
	1.05	2.75	0.91	1.76	1.41	2.65	1.14	2.57	1.02	1.02	0.82	8.16	0.98	0.99
average	1	2.64	1	3.3475	1	3.3025	1	1.875	1	0.9975	1	6.7125	1	1.08
t-test		2.23404e-06		0.0151948		0.00039841		0.0110972		0.867529		3.11362e-05		0.322157

## Sheet: 2F
	Figure 2F: Cell Surface area
	Slide #	WT	LOI	LOI + BAC		t-test
	1	154	2548	854		WT vs LOI	1.98693e-12
	2	1520	3955	1022		LOI vs LOI + BAC	2.97816e-16
	3	895	4025	854		WT vs LOI + BAC	0.466352
	4	1254	4754	1078
	5	2302	2141	956
	6	2231	3524	758
	7	854	3654	1125
	8	358	3954	864
	9	1065	2014	268
	10	2658	4154	1923
	11	1302	2021	564
	12	351	5412	784
	13	658	1324	1023
	14	641	3845	268
	15	1054	4754	1075
	16	2658	4254	451
	17	451	3020	892
	18	362	2589	695
	19	157	6548	795
	20	3541	3548	1021
	21	1200	4451	1326
	22	359	6845	1215
	23	2954	4512	859
	24	126	3251	926
	25	87	4512	745
	26	475	3558	1084
	27	328	2541	689
	28	269	3922	1402
	29	1345	1452	1036
	30	69	3546	1045
average		1055.93	3687.6	919.9

## Sheet: 2G
	Slide #	no drug	IGF2	IGF2 and RAPAMYCIN		no drug	IGF2	IGF2 and BMS
	1	845	3325	624		954	2684	1621
	2	1624	4521	415		652	2389	1502
	3	954	4756	1054		1524	3415	484
	4	1152	2033	2001		1651	2354	1026
	5	895	1025	1056		845	3844	866
	6	451	6321	745		756	1059	495
	7	2648	4211	623		811	5214	451
	8	654	4154	845		1254	3654	744
	9	1152	2063	1085		1003	4842	362
	10	2024	3254	365		1426	4251	659
	11	3201	2854	345		698	3522	1025
	12	451	3451	745		655	3954	487
	13	662	2845	310		846	4514	1456
	14	845	2000	1425		226	894	1329
	15	1021	4154	2030		1352	874	2038
	16	1054	2541	1652		1164	3612	997
	17	748	1452	2125		1854	1958	1541
	18	693	3256	1854		1952	4851	1565
	19	226	4851	1654		620	2306	1475
	20	1254	2021	1054		610	2031	1655
	21	2054	1089	1754		684	4751	632
	22	699	4854	365		795	2064	457
	23	1355	3264	487		1403	3021	956
	24	475	2376	524		546	2258	745
	25	849	2354	665		452	3845	1524
	26	456	2021	2010		1454	2644	1001
	27	894	3844	1066		736	897	2655
	28	1541	3412	1842		2033	4754	3254
	29	712	1894	855		215	2316	2036
	30	889	3325	689		1033	5214	1554
	31	1258	2544	720			6784
	32	754		1026
	33	1231
average		1082.45	3098.87	1062.81		1006.8	3250.65	1219.73
t test vs no drug			1.31492e-11	0.897529			3.99288e-05	0.169542
t test vs IGF2				8.85113e-12				4.52415e-09

## Sheet: 2H Fig Supp 1B
	Figure 2H or Figure 2-figure supplment 1B
	Ki-67			pS6K1			pS6K1			t-S6K1			t-S6K1
	control	IGF2	IGF2 & RAPA	control	IGF2	IGF2 & RAPA	control	IGF2	IGF2 & BMS	control	IGF2	IGF2 & RAPA	control	IGF2	IGF2 & BMS
	KI/no drug	KI/+IGF2	KI/+IGF2, RAPA	pS6K1/no	pS6K1/IGF2	pS6K1/IGF, RAPA	pS6K1/no	pS6K1/IGF2	pS6K1/IGF, BMS	t-S6K1/no	tS6K1/IGF2	tS6K1/IGF, RAPA	tS6K1/no	pS6K1/IGF2	tS6K1/IGF, BMS
	1.2	5.85	2.71	1.18	2.25	0.01	1.32	4.17	1.7	1.14	0.9	0.75
	0.92	3.6	1.8	0.84	2.13	0	0.74	3.84	1.92	0.81	0.98	0.83	0.84	0.98	1.03
	0.88	3.44	1.49	0.98	1.79	0	0.95	3.44	1.52	1.06	1.07	0.69	1.1	1.18	0.68
													1.06	1.28	0.91
average	1	4.29667	2	1	2.05667	0.00333333	1.00333	3.81667	1.71333	1.00333	0.983333	0.756667	0.97	1.08	0.855
t-test		0.0136724	0.0579607		0.0033689	0.000541482		0.00048417	0.0258315		0.865598	0.0831255		0.571501	0.650511

## Sheet: 2J Fig Supp 1C
	Ki-67				p-S6K1				t-S6K1
	LOI	LOI + Cre	Flox + Cre		LOI	LOI + Cre	Flox + Cre		LOI	LOI + Cre	Flox + Cre
	1.78364	1.77601	0.609842		13.7392	13.14	3.77934		1.32806	1.19307	1.28764
	1.73608	2.38828	0.798544		4.61037	4.39147	0.977286		1.25129	0.906046	1.02593
	1.81465	1.65362	1.4594		9.38524	7.16228	3.74726		1.1879	1.06219	1.83535
average	1.77812	1.9393	0.955927		9.24492	8.23124	2.83463		1.25575	1.05377	1.38297
t test			0.005895				0.0511333				0.245368

## Sheet: Fig Supp 2
	H19 mRNA			Igf2 mRNA
	LOI + BAC	LOI		LOI + BAC	LOI
	0.93913	0.00745342		0.857143	1.02087
	0.834783	0.00819876		0.82825	0.905297
	1.13292			1.00161
	1.22981			1.22311
	0.961491			1.19422
	0.901863			0.895666

## Sheet: Fig Supp 3
	H19 lncRNA						Mir675-5p						Mir675-5p
	e17.5			e17.5			e17.5			e17.5			e17.5			e17.5
	WT	H19DEx1/H19+		WT	H19DEx1/H19+		WT	H19DEx1/H19+		WT	H19DEx1/H19+		WT	H19DEx1/H19+		WT	H19DEx1/H19+
	72.7448	9.47924		97.0875	31.8057		120.24	77.6964		161.244	101.695		132.577	50.7624		38.4983	61.4663
	147.521	5.18654		72.5656	32.8134		95.3245	109.499		32.7427	106.013		95.3848	76.9413		156.685	97.1218
	107.991	5.36944		130.347	36.7893		84.4354	47.1693		106.013	96.2091		72.038	33.7236		104.817	49.4097
	71.7433	11.2728
average	100	7.827		100	33.8028		100	78.1216		100	101.306		100	53.8091		100	69.3326
t test		0.00218086			0.0169971			0.353918			0.97377			0.0998075			0.454695

## Sheet: Fig Supp 4
		H19 mRNA/neonates
		Muscle	Liver	Lung	Heart	Brain
		1.11	0.95	0.24	0.22	0.04
		1.1	1.1	0.29	0.28	0.06
		0.79	0.9	0.35	0.21	0.03
		1	0.9	0.2	0.18	0.06
	average	1	0.9625	0.27	0.2225	0.0475
