# Supplementary material for: Cardiac pathologies in mouse loss of imprinting models are due to misexpression of H19 long noncoding RNA
Source: eLife. 2021 Aug 17;10:e67250. doi: 10.7554/eLife.67250 (PMC8425947; doi:10.7554/eLife.67250)
Supplement: Figure 3—source data 1. [file elife-67250-fig3-data1.xlsx]

## Sheet: Panel B or Figure Supp 1
	ANP			Myh7			Serca2			Cleaved Caspase-3			Cleaved Caspase-7			Cleaved PARP
	WT	LOI		WT	LOI		WT	LOI		WT	LOI		WT	LOI		WT	LOI
	1.19413	1.68036		0.550986	5.69721		0.916913	0.55303		0.593748	3.1071		0.572229	2.08545		0.530607	5.70965
	1.21349	3.88878		2.13225	8.13829		0.83573	0.741006		1.53047	3.22911		1.30683	2.37448		1.71193	5.7123
	0.592374	5.45042		0.316759	8.38194		1.24736	0.456996		0.875786	3.77822		1.12094	2.29592		0.757462	7.1691
average	1	3.67318		1	7.40582		1	0.583677		1	3.37147		1	2.25195		1	6.19702
t test		0.0741241			0.00339651			0.0510046			0.00236701			0.00614059			0.00101543

## Sheet: Panel C
		Perivascular fibrosis area (A)	Vascular area (B)	A/B		Perivascular fibrosis area (A)	Vascular area (B)	A/B
		1578	20654	0.076402		4218	5735	0.735484
		2654	8847	0.299989		7541	15244	0.494686
		1255	8177	0.153479		10524	9541	1.10303
		6958	19548	0.355944		6254	12584	0.49698
		3653	19584	0.18653		1688	2854	0.591451
		2451	19880	0.12329		12326	14845	0.830313
		3261	15425	0.21141		1044	1655	0.630816
		1414	2832	0.499294		12069	12987	0.929314
		3254	20586	0.158069		3214	4026	0.798311
		1023	7456	0.137205		1512	7856	0.192464
		2058	13784	0.149304		3654	20220	0.180712
		1887	14022	0.134574		10236	22236	0.460335
		6954	18954	0.366888		6201	7486	0.828346
		6941	19802	0.35052		5548	6150	0.902114
		3624	18891	0.191837		3967	3894	1.01875
	average			0.226316				0.67954
	t test							3.10379e-06

## Sheet: Panel E
		Aorta Outer Diameter
	Pressure	WT											LOI
	0	1212.5	1075	1090	1203.5	1071	968.5	963	1050.5	1009	1101.5		1210.5	1392	1334.5	1018	1222	1162.5	1225.5	1486.5
	25	1397.5	1364	1259.5	1362	1274	1216.5	1257.5	1334	1264.5	1339.5		1491	1692.5	1548.5	1444	1460.5	1535.5	1523.5	1865.5
	50	1593.5	1565	1429.5	1492.5	1433	1345.5	1431	1541.5	1418	1515		1684.5	1936.5	1741	1750	1669.5	1765	1741	2108.5
	75	1822.5	1804	1589.5	1636	1619.5	1526.5	1632.5	1722	1615.5	1718.5		1905	2210.5	1991	1983	1951.5	2060	2000.5	2370.5
	100	2013.5	1976	1771	1822.5	1805.5	1718.5	1839.5	1938.5	1796.5	1925.5		2069	2354	2191.5	2172	2219.5	2288.5	2188.5	2565
	125	2113.5	2056.5	1908.5	1971.5	1919.5	1868	1936.5	2048.5	1938	2050.5		2136	2382.5	2279	2280	2328	2408	2270.5	2618.5
	150	2145.5	2087.5	1977.5	2074.5	1972	1940.5	1983	2106.5	2005.5	2091		2143.5	2401	2301	2320	2380.5	2454.5	2305	2670
	175	2163	2105.5	2006	2124.5	2006.5	1961	2008	2130.5	2035	2101		2160.5	2399.5	2315	2331	2410.5	2478	2327	2695.5

## Sheet: Panel F
	WT											LOI
0-25	0.152577	0.268837	0.155505	0.131699	0.189542	0.256066	0.305815	0.269871	0.253221	0.216069		0.231722	0.215876	0.16036	0.418468	0.195172	0.32086	0.243166	0.254961
25-50	0.14025	0.147361	0.134974	0.095815	0.124804	0.106042	0.137972	0.155547	0.121392	0.131019		0.129779	0.144165	0.124314	0.211911	0.143102	0.149463	0.142763	0.13026
50-75	0.143709	0.152716	0.111927	0.0961474	0.130147	0.134522	0.140811	0.117094	0.139281	0.134323		0.130899	0.141492	0.143596	0.133143	0.168913	0.167139	0.149052	0.124259
75-100	0.104801	0.0953437	0.114187	0.113998	0.11485	0.125778	0.126799	0.125726	0.11204	0.120454		0.0860892	0.0649174	0.100703	0.0953101	0.13733	0.110922	0.0939765	0.0820502
100-125	0.0496648	0.0407389	0.0776397	0.0817558	0.0631404	0.0869945	0.0527317	0.0567449	0.0787643	0.0649182		0.0323828	0.012107	0.039927	0.0497238	0.0488849	0.0522176	0.0374686	0.0208577
125-150	0.0151408	0.0150742	0.0361541	0.0522445	0.0273509	0.0388116	0.0240124	0.0283134	0.0348297	0.0197513		0.00351124	0.00776495	0.00965336	0.0175439	0.0225516	0.0193106	0.0151949	0.0196678
150-175	0.00815661	0.00862275	0.0144121	0.0241022	0.0174949	0.0105643	0.0126072	0.0113933	0.0147096	0.0047824		0.00793095	-0.0006247	0.00608431	0.00474138	0.0126024	0.00957425	0.00954447	0.00955056

## Sheet: Figure Supp 3
		WT											LOI
Systolic		108	116	104	104	90	106	109	98	103	114		109	80	92	87	88	88	103	99
Diastolic		70	74	61	66	59	67	75	65	67	74		77	55	64	58	64	63	71	70
Pulse Pressure		38	42	43	38	31	39	34	33	36	40		32	25	28	29	24	25	32	29
		WT	LOI
	Systolic Avg	105.2	92.4286
	Diastolic Avg	67.8	64.5714
	PP Avdg	37.4	27.8571

## Sheet: Figure Supp 4
pressure	WT												LOI
0	367	363.5	338	373.5	339	327.5	337.5	354	327.5	334.5	342		399.5	401.5	425	400.5	407	363.5	378.5	402
25	451.5	442.5	431	464.5	406.5	429.5	416	455	410	419	436		487	526	494.5	483	496	479.5	489	517.5
50	515	505.5	498	529	466	500	473	526	476.5	475.5	500.5		551	640	556	549	560	557.5	575	589.5
75	595.5	590	569.5	604	563.5	588.5	543.5	590	525	552.5	581		639.5	766.5	629	633	679	647.5	681.5	694
100	676	700.5	651	681	651	656.5	619.5	672	596	644	670		731	823.5	703.5	726	797	737	764	800
125	722	759	702	741	715.5	709.5	690	739	669.5	691.5	741		782	835.5	765	774	830	759.5	797	832
150	743	767	724	761	735	726	718	761	709	703.5	765		791	840	790.5	785.5	834.5	774	809.5	841
175	753.5	770	726	765.5	744.5	730.5	726	768	725.5	707.5	771		794.5	845	801.5	788.5	839.5	781	817	844
