# Supplementary material for: Cardiac pathologies in mouse loss of imprinting models are due to misexpression of H19 long noncoding RNA
Source: eLife. 2021 Aug 17;10:e67250. doi: 10.7554/eLife.67250 (PMC8425947; doi:10.7554/eLife.67250)
Supplement: Figure 4—source data 1. [file elife-67250-fig4-data1.xlsx]

## Sheet: Panel A
	LOI				LOI + BAC
	Perivascular fibrosis area (A)	Vascular area (B)	A/B		Perivascular fibrosis area (A)	Vascular area (B)	A/B
	3654	22837.5	0.16		2658	6994.74	0.38
	2514	5348.94	0.47		1541	9631.25	0.16
	10265	64156.2	0.16		2862	11925	0.24
	1854	4120	0.45		1032	2646.15	0.39
	1634	2970.91	0.55		1421	8881.25	0.16
	2365	2657.3	0.89		695	2673.08	0.26
	4521	12558.3	0.36		1023	5384.21	0.19
	4865	10811.1	0.45		956	3676.92	0.26
	1954	4070.83	0.48		741	2058.33	0.36
	1754	4497.44	0.39		912	3800	0.24
	3652	13042.9	0.28		1451	7636.84	0.19
average			0.421818				0.257273
t- test							0.0212643

## Sheet: Panel C or Fig Supp 1A
	Counts from Image J normalized to b-tubulin and then to LOI
	ANP			Myh7			Cleaved Caspase-3
	LOI	LOI + BAC		LOI	LOI + BAC		LOI	LOI + BAC
	1.06434	0.0522882		0.919154	0.344776		0.81524	0.581415
	1.23342	0.144529		0.876962	0.258203		0.914856	0.317389
	0.702237	0.0807957		1.20388	0.082043		1.2699	0.329121
average	1	0.0925377		1	0.228341		1	0.409308
t test		0.00466352			0.00387192			0.0221281

## Sheet: Panel D
		Fiber diameter
		WT	H19DEx1/H19+
		8.4	15.5
		8.2	19.2
		8.6	8.9
		7.4	10.2
		6.5	17.5
		8.5	18.5
		7.2	10.2
		8.5	8.7
		6.5	4.7
		8.2	9.5
		12.1	12.5
		10.2	14.2
		6.2	16.2
		9.8	17.5
		10.1	13.4
		9.8	12.4
		8.9	10.3
		6.5	11.5
		7.5	17.5
		12.3	14.1
		8.5	16.3
		10.6	12.2
		6.8	15.4
		5.6	16.2
		7.5	18.4
		9.5	10.1
		4.6	14.5
		8.4	7.5
		9.5	9.1
		8.6	14.1
		10.2	16.2
		14.6	14.2
		5.2	12.4
		10.6	10.3
		8.5	10.7
		16.3	8.1
		12	10.2
		17.5	14.8
		6.5	6.4
		4	18.5
		15.4	14.2
		10.4	16.7
		14.2	15.4
		16.2	17.5
		14	19.5
		8.4	13.2
		7.5	8.57
		6.8	9.47
		12.7	8.54
		6.3	15.56
	average	9.366	13.1348
	t test		3.59462e-07

## Sheet: Panel F
	WT				H19DEx1/H19+
	Perivascular fibrosis area (A)	Vascular area (B)	A/B		Perivascular fibrosis area (A)	Vascular area (B)	A/B
	3541	12154	0.291344		7541	12162.9	0.62
	1026	6894	0.148825		2632	5721.74	0.46
	1205	3565	0.338008		4851	9702	0.5
	2054	16954	0.121151		6232	18884.8	0.33
	3651	18556	0.196756		1547	2275	0.68
	845	3205	0.263651		5654	8698.46	0.65
	2451	23954	0.102321		16230	21640	0.75
	3612	38451	0.0939377		3610	5469.7	0.66
	1052	12015	0.0875572		7459	12030.6	0.62
	744	4475	0.166257		14854	20630.6	0.72
	950	7701	0.123361		2658	3908.82	0.68
average			0.175743				0.606364
t test							9.53701e-09

## Sheet: Panel G or Fig Supp 1B
	Image J counts normalized to GAPDH and then to WT
	ANP		Myh7		Serca2		Cleaved Caspase-3		Cleaved PARP
	WT	H19DEx1	WT	H19DEx1	WT	H19DEx1	WT	H19DEx1	WT	H19DEx1
	0.787422	2.31843	0.673072	5.30488	1.09279	0.702514	0.614364	3.42213	0.823864	2.2852
	0.985284	3.70181	0.830214	6.75587	0.927952	0.387588	0.502455	5.39071	1.18824	3.20985
	1.22729	3.43555	1.49671	2.7944	0.979254	0.495707	1.88318	4.26264	0.987892	4.56819
average	1	3.15193	1	4.95172	1	0.528603	1	4.3585	1	3.35441
		0.00825767		0.0289271		0.0107103		0.00964954		0.024735
