# Supplementary material for: Cardiac pathologies in mouse loss of imprinting models are due to misexpression of H19 long noncoding RNA
Source: eLife. 2021 Aug 17;10:e67250. doi: 10.7554/eLife.67250 (PMC8425947; doi:10.7554/eLife.67250)
Supplement: Figure 5—source data 1. [file elife-67250-fig5-data1.xlsx]

## Sheet: Panel D
	H19 mRNA					SM22alpha mRNA					Snail mRNA					Slug mRNA
	WT		H19DEx1			WT		H19DEx1			WT		H19DEx1			WT		H19DEx1
	pcDNA3	pcDNA3-H19	pcDNA3	pcDNA3-H19		pcDNA3	pcDNA3-H19	pcDNA3	pcDNA3-H19		pcDNA3	pcDNA3-H19	pcDNA3	pcDNA3-H19		pcDNA3	pcDNA3-H19	pcDNA3	pcDNA3-H19
	A	B	C	D		A	B	C	D		A	B	C	D		A	B	C	D
	1	2.376	0.0015	5.245		1	0.553	2.051	1.021		1	0.742	1.382	0.551		1	1.544	1.405	1.14
	0.724	5.215	0.0022	3.895		0.885	1.083	1.631	1.395		0.895	1.061	1.504	0.994		0.604	1.074	1.845	0.772
	1.274	6.371	0.0032	5.048		1.115	1.575	1.667	1.365		1.105	1.096	1.338	1.125		1.396	1.355	1.634	1.382
average	0.999333	4.654	0.0023	4.72933		1	1.07033	1.783	1.26033		1	0.966333	1.408	0.89		1	1.32433	1.628	1.098
t test (C v D)				0.000358429					0.0440712					0.0455692					0.0720227
t test (A v C)			0.00328352					0.00641336					0.00648619					0.0742784

## Sheet: Panel F
	% Endothelial cells co-expressing mesenchymal markers
	Adult			Adult			Adult			Neonate
	WT	H19DEx1		LOI + BAC	LOI		WT	LOI		WT	H19DEx1
	3.125	25.9259		4.65116	15.625		4.16667	31.8182		14.2857	9.375
	4.54545	18.75		3.125	7.89474		3.33333	19.5122		6.25	6.89655
	2.85714	25		3.84615	4.87805		0	25.7143		6.25	23.3333
	3.125	33.3333		0	27.5862		4.16667	17.9487		0	8
	0	16.6667		3.33333	7.5		6.45161	40.5405		3.44828	16.6667
										6.45161	20
average	2.73052	23.9352		2.99113	12.6968		3.62366	27.1068		6.0468	12.8543
change		8.7658			4.24482			7.48051			2.1258
t test		0.000114126			0.0499353			0.000591019			0.120384
