# Supplementary material for: Cardiac pathologies in mouse loss of imprinting models are due to misexpression of H19 long noncoding RNA
Source: eLife. 2021 Aug 17;10:e67250. doi: 10.7554/eLife.67250 (PMC8425947; doi:10.7554/eLife.67250)
Supplement: Figure 6—source data 1. [file elife-67250-fig6-data1.xlsx]

## Sheet: Panel B
H19 in neonatal hearts			H19 in adult hearts			Igf2 in neonatal hearts			Igf2 in adult hearts
WT #1	77.6478		WT #1	140.971		WT #1	79.3672		WT #1	102.323
WT #2	106.808		WT #2	53.9764		WT #2	74.5673		WT #2	67.042
WT #3	86.7549		WT #3	133.83		WT #3	146.065		WT #3	133.158
WT #4	128.79		WT #4	71.2223					WT #4	97.4772
H19∆let7/H19∆let7 #1	109.052		H19∆let7/H19∆let7 #1	166.486		H19∆let7/H19∆let7 #1	160.95		H19∆let7/H19∆let7 #1	105.2
H19∆let7/H19∆let7 #2	134.259		H19∆let7/H19∆let7 #2	143.435		H19∆let7/H19∆let7 #2	106.188		H19∆let7/H19∆let7 #2	131.325
H19∆let7/H19∆let7 #3	152.1		H19∆let7/H19∆let7 #3	64.86		H19∆let7/H19∆let7 #3	114.601		H19∆let7/H19∆let7 #3	101.617
H19∆let7/H19∆let7 #4	115.27		H19∆let7/H19∆let7 #4	50.0139					H19∆let7/H19∆let7 #4	86.6419

## Sheet: Panel D
	Fibre diameter (mm)
	WT		H19∆let7/H19∆let7
	8.18		10.2
	10		13.4
	11.1		16.7
	12		11.2
	9.93		12.3
	8.76		12.1
	8.9		11.6
	8.2		15.5
	10.5		18
	10.4		11.7
	9.04		14.4
	11.08		13
	10		18.6
	7.76		14
	8.17		15.5
	8.6		17.3
	11.4		16.9
	8.17		14.2
	7.25		16.4
	10.4		15.5
	10.5		21
	12		18.2

## Sheet: Panel F
perivascular fibrosis area/total perivascular area
	WT		H19∆let7/H19∆let7
	0.221429		3.03704
	0.115294		1.35798
	0.136842		0.717213
	0.109922		1.13624
	0.270705		0.840807
	0.142222		1.18116
	0.11373		0.686667
	0.0887097		2.81928
	0.234545		0.345528
	0.381285		0.30974
	0.149787		1.61581
	0.104494		0.319861
	0.151748		0.617391
	0.104464		1.18444
	0.144737		1.35125
	0.200917		1.61581
	0.12426		0.52967
	0.238957		2.12803
	0.09		0.36646
	0.0548		1.512
	0.163542		0.298056
	0.0614525		0.970588
	0.123404		0.563636
	0.07		0.390925
	0.0671141		1.52
	0.166667		0.520468
	0.158416		1.08108
	0.227273		1.09367

## Sheet: Figure Supp 1
	H19 mRNA
	Before Pulldown			After Pulldown
				control oligo	H19 oligo	control oligo	H19 oligo
	WT	MUTANT		WT	WT	MUTANT	MUTANT
	1.013	1.013		0.02	0.97	0.01	0.9
	0.945	1.006		0.02	0.97	0.01	0.89
	1.041	0.965		0	1.05	0	1.36
avg	0.999667	0.994667		0.0133333	0.996667	0.00666667	1.05
t test		0.884106					0.751626
	let-7e
	Before Pulldown			After Pulldown
				control oligo	H19 oligo	control oligo	H19 oligo
	WT	MUTANT		WT	WT	MUTANT	MUTANT
	1.02	0.92		0	1.1	0	0
	0.89	0.75		0	0.91	0	0
	1.09	1.12		0	0.99	0	0
avg	1	0.93		0	1	0	0
t test		0.596637					5.41078e-05
	let-7g
	Before Pulldown			After Pulldown
				control oligo	H19 oligo	control oligo	H19 oligo
	WT	MUTANT		WT	WT	MUTANT	MUTANT
	0.91	0.89		0	1.07	0	0
	1.11	0.99		0	0.93	0	0
	0.98	1.19		0	1	0	0
avg	1	1.02333		0	1	0	0
t test		0.836374					1.58339e-05
	let-7i
	Before Pulldown			After Pulldown
				control oligo	H19 oligo	control oligo	H19 oligo
	WT	MUTANT		WT	WT	MUTANT	MUTANT
	1.01	1.12		0	0.99	0	0
	0.94	0.63		0	1.25	0	0
	1.06	1.75		0	0.76	0	0
avg	1.00333	1.16667		0	1	0	0
t test		0.642691					0.00211725
	MyoG
	Before Pulldown			After Pulldown
				control oligo	H19 oligo	control oligo	H19 oligo
	WT	MUTANT		WT	WT	MUTANT	MUTANT
	1.09	0.58		0.01	0.95	0.02	1.87
	0.96	0.56		0.01	0.97	0.03	3.92
	0.95	0.53		0.01	1.07	0.03	4.66
avg	1	0.556667		0.01	0.996667	0.0266667	3.48333
t test		0.000726252					0.0408607
	GAPDH
	Before Pulldown			After Pulldown
				control oligo	H19 oligo	control oligo	H19 oligo
	WT	MUTANT		WT	WT	MUTANT	MUTANT
	1.03	1.05		0	0.01	0	0
	0.99	1.01		0	0	0	0
	1	0.99		0	0.01	0	0
avg	1.00667	1.01667		0	0.00666667	0	0
t test		0.663804					0.116117

## Sheet: Panel G or Figure Supp 2
	Image J counts were normalized to b-tubulin and then to the WT average
	ANP			Myh7			Cleaved Caspase-3			Cleaved Caspase-7			Cleaved PARP
	WT	H19Dlet7		WT	H19Dlet7		WT	H19Dlet7		WT	H19Dlet7		WT	H19Dlet7
	1.23869	1.85979		1.38407	2.91103		1.21304	2.29764		1.40802	2.14183		1.4451	1.62764
	0.911064	3.42854		0.859142	2.80957		0.913022	3.82592		1.14905	1.81298		0.849165	1.65319
	0.850244	3.26391		0.756783	3.12716		0.873943	3.38411		0.442927	1.96026		0.70574	1.91059
average	1	2.85075		1	2.94925		1	3.16922		1	1.97169		1	1.73047
t test		0.0224844			0.000830509			0.00966396			0.0329067			0.0400604
