# Supplementary material for: Cardiac pathologies in mouse loss of imprinting models are due to misexpression of H19 long noncoding RNA
Source: eLife. 2021 Aug 17;10:e67250. doi: 10.7554/eLife.67250 (PMC8425947; doi:10.7554/eLife.67250)
Supplement: Supplementary file 1. — As described in the text, each mouse presents a unique array of phenotypes. LV, left ventricular; AW, anterior wall; OT, outflow tract; sys, systole; dia, diastole. [file elife-67250-supp1.xlsx]

## Sheet: Supplemental Table 1
		Ejection Fraction (%)	LV Volume (sys)	LVAW (sys)	LVOT mean velocity	Aorta diameter (sys)	Brachial Arch diameter (sys)
	Ejection Fraction (%)	1	0.81	0.526	0.024	0.005	0.155
	LV Volume (sys)		1	0.495	0.002	0.097	0.158
	LVAW (dia)			1	0.287	0.068	0.441
	LVOT mean velocity				1	0.43	0.625
	Aorta diameter (sys)					1	0.68
	Brachial Arch diameter (sys)						1
