# Supplementary material for: Cardiac pathologies in mouse loss of imprinting models are due to misexpression of H19 long noncoding RNA
Source: eLife. 2021 Aug 17;10:e67250. doi: 10.7554/eLife.67250 (PMC8425947; doi:10.7554/eLife.67250)
Supplement: Supplementary file 2. [file elife-67250-supp2.xlsx]

## Sheet: Supplementary File 2
	Primers for qPCR
	Gene	Primers	Product size
	H19	5'-GCACTAAGTCGATTGCACTGG	164
		5'-GCCTCAAGCACACGGCCACA
	Igf2	5'-GAGCTTGTTGACACGCTTC	129
		5'-ACGTTGGCCTCTCTGAAC
	GAPDH	5'-TCAATGAAGGGGTCGTTGAT	125
		5'-CGTCCCGTAGACAAAATGGT
	Sm22a	5'-GACTGCACTTCTCGGCTCAT	100
		5'-CCGAAGCTACTCTCCTTCCA
	Snail	5'-AGTGGGAGCAGGAGAATGG	102
		5'CTTGTGTCTGCACGACCTGT
	Slug	5'-GATGTGCCCTCAGGTTTGAT	102
		5'-GGCTGCTTCAAGGACACATT
	Primers for genotyping
	Allele	Primers	Product size
	H19+	5-AGCATCCACAAATCAGGGCA	153
	H19DICR	5’-CCTACCTGCTTCTC CCAAGC	200
	H19ICRflox	5’-TGATGGTGGTGTCTGCATCC	290
	H19+	5’-GGGGACCCATCTGTGTCTTG	257
	H19DEx1	5’-CGGAGCCACTCCAGTTAGAA	170
		5’-AAAGGAGACATCGTCTCGGG
	Myh6+	5’-TAGAGTCCTGGTGGGAGAGC	208
	Myh6Cre	5’-CTTTCGGAGGTACTGGGCTG	385
		5’-GCATCGACCGGTAATGCAGGC
	H19+	5'-AAAGGAGACATCGTCTCGGG	193
	H19Let7	5’-TTCTTGCTGGATCCCATGGTC	168
