# Supplementary material for: Cardiac pathologies in mouse loss of imprinting models are due to misexpression of H19 long noncoding RNA
Source: eLife. 2021 Aug 17;10:e67250. doi: 10.7554/eLife.67250 (PMC8425947; doi:10.7554/eLife.67250)
Supplement: Supplementary file 3. [file elife-67250-supp3.xlsx]

## Sheet: Supplementary File 3
	Antibody	Company	Catalog #	Dilution	RRID
	ANP	Abcam	ab91250	1:1000	RRID:AB_2049188
	Myh7	Santa Cruz	sc52089	1:200	RRID:AB_2147281
	Serca2	Abcam	ab2861	1:1000	RRID:AB_2061425
	Cleaved Caspase 3	Abcam	ab9664	1:1000	RRID:AB_2070042
	Cleaved Caspase 7	Abcam	ab8438	1:1000	RRID:AB_11178377
	Cleaved Parp	Abcam	ab5625	1:1000	RRID:AB_10699459
	b-Tubulin	Abcam	ab6046	1:2000	RRID:AB_2210370
	Ki-67	Abcam	ab15580	1:1000	RRID:AB_443209
	Cyclin E1	Abcam	ab3927	1:100	RRID:AB_304167
	Cyclin D1	Abcam	ab134175	1:1000	RRID:AB_2750906
	GAPDH	Cell Signaling	2118	1:2000	RRID:AB_561053
	Myh6	Santa Cruz	sc168676	1:100	RRID:AB_10850784
	Phallodin	Cell Signaling	8593	1:200	RRID:AB_2892555
	p-AKT	Cell Signaling	4060	1:1000	RRID:AB_2315049
	t-AKT	Cell Signaling	9272	1:1000	RRID:AB_329827
	p-S6K1	Cell Signaling	9234	1:1000	RRID:AB_2269803
	t-S6K1	Cell Signaling	2708	1:1000	RRID:AB_390722
	p-rpS6	Cell Signaling	4858	1:1000	RRID:AB_916156
	t-rpS6	Cell Signaling	2317	1:1000	RRID:AB_2238583
	CD31	Abcam	ab28364	1:50	RRID:AB_726362
	aSMA	Abcam	ab21027	1:100	RRID:AB_1951138
	aSMA	GeneTex	GTX25694	1:500	RRID:AB_380656
	vWF	DAKO	A0082	1:1000	RRID:AB_2315602
	488 Goat anti-rabbit	Life Technology	A11008	1:500	RRID:AB_143165
	488 Goat anti-mouse	Life Technology	A11001	1:500	RRID:AB_2534069
	488 Donkey anti-goat	Life Technology	A11055	1:500	RRID:AB_2534102
	555 Goat anti-mouse	Life Technology	A21424	1:500	RRID:AB_141780
	555 Donkey anti-rabbit	Life Technology	A31572	1:500	RRID:AB_162543
	DAPI	Life Technology	D3571	1:1000	RRID:AB_2307445
