# Supplementary material for: Cardiac pathologies in mouse loss of imprinting models are due to misexpression of H19 long noncoding RNA
Source: eLife. 2021 Aug 17;10:e67250. doi: 10.7554/eLife.67250 (PMC8425947; doi:10.7554/eLife.67250)
Supplement: Table 1—source data 1. [file elife-67250-table1-data1.xlsx]

## Sheet: Figure 3D
Perivascular fibrosis area/Vascular area	WT		LOI
	0.0764017		0.735484
	0.299989		0.494686
	0.153479		1.10303
	0.355944		0.49698
	0.18653		0.591451
	0.12329		0.830313
	0.21141		0.630816
	0.499294		0.929314
	0.158069		0.798311
	0.137205		0.192464
	0.149304		0.180712
	0.134574		0.460335
	0.366888		0.828346
	0.35052		0.902114
	0.191837		1.01875

## Sheet: Figure 4B
Perivascular fibrosis area/Vascular area	LOI	LOI + H19BAC
	0.16	0.38
	0.47	0.16
	0.16	0.24
	0.45	0.39
	0.55	0.16
	0.89	0.26
	0.36	0.19
	0.45	0.26
	0.48	0.36
	0.39	0.24
	0.28	0.19

## Sheet: Figure 4D
Fibre diameter (um)	WT	H19 ∆Ex1/H19+
	8.4	15.5
	8.2	19.2
	8.6	8.9
	7.4	10.2
	6.5	17.5
	8.5	18.5
	7.2	10.2
	8.5	8.7
	6.5	4.7
	8.2	9.5
	12.1	12.5
	10.2	14.2
	6.2	16.2
	9.8	17.5
	10.1	13.4
	9.8	12.4
	8.9	10.3
	6.5	11.5
	7.5	17.5
	12.3	14.1
	8.5	16.3
	10.6	12.2
	6.8	15.4
	5.6	16.2
	7.5	18.4
	9.5	10.1
	4.6	14.5
	8.4	7.5
	9.5	9.1
	8.6	14.1
	10.2	16.2
	14.6	14.2
	5.2	12.4
	10.6	10.3
	8.5	10.7
	16.3	8.1
	12	10.2
	17.5	14.8
	6.5	6.4
	4	18.5
	15.4	14.2
	10.4	16.7
	14.2	15.4
	16.2	17.5
	14	19.5
	8.4	13.2
	7.5	8.57
	6.8	9.47
	12.7	8.54
	6.3	15.56

## Sheet: Figure 4F
Perivascular fibrosis area/Vascular area	WT	H19 ∆Ex1/H19+
	0.291344	0.62
	0.148825	0.46
	0.338008	0.5
	0.121151	0.33
	0.196756	0.68
	0.263651	0.65
	0.102321	0.75
	0.0939377	0.66
	0.0875572	0.62
	0.166257	0.72
	0.123361	0.68

## Sheet: Table 1-Source data
Group	Genotype	HR	LV_Vol_s	LV_Vol_d	EF	LVAW_s	LVAW_d	LVPW_s	LVPW_d	LVOT_mean_grad	LVOT_mean_vel	LVOT_Peak_grad	LVOT_Peak_vel	Aor_sys	Aor_dia	First brach. Arch
13 month	Wild_Type	564	24.9	64.4	61.3	1.35	0.875	1.3	0.85	2.3	752	5.6	1187
	Wild_Type	518	27.5	77.9	64.7	1.375	0.875	1.35	0.875	3.7	957	8.2	1433
	Wild_Type	530	23.9	67.6	64.7	1.4	0.9	1.35	0.825	2.1	725	5.5	1175
	Wild_Type	518	25.4	63.4	60	1.373	0.872	1.3	0.825	1.8	676	4.8	1092	1.44	1.3	0.674
	Wild_Type	447	31.4	79.8	60.6	1.425	0.85	1.3	0.8	2.2	749	5.4	1162	1.659	1.413	0.657
	Wild_Type	522	16	45.2	64.6	1.375	0.875	1.4	0.875	2.5	791	5.5	1170	1.678	1.445	0.817
	Wild_Type	544	17.2	66.4	74	1.475	0.925	1.4	1	1.3	572	4.1	1017	1.6	1.328	0.692
	Wild_Type	447	21.3	65.9	67.6	1.438	0.872	1.417	0.85	2.7	822	6.2	1245	1.8	1.669	0.842
	Wild_Type	463	31.2	81	61.4	1.351	0.872	1.308	0.85	2.8	840	7	1319	1.632	1.34	0.901
	Wild_Type	480	20.8	64.2	67.7	1.425	0.9	1.425	0.95	2.8	836	6.7	1297	1.656	1.498	0.792
	Wild_Type	507	25.1	71.1	64.7	1.395	0.85	1.351	0.85	2.1	727	4.9	1109	1.738	1.492	0.826
	LOI	550	59.3	105.4	43.7	1.438	1.044	1.495	1.072	12.4	1763	36	2995	2.95		1.355
	LOI	487	25.4	68.2	62.8	1.382	0.874	1.382	0.874	3.5	939	8.8	1486	2	1.85	1.047
	LOI	554	29	67.8	57.2	1.373	0.915	1.351	0.85	5.7	1189	12.9	1796	2.123	1.97	0.982
	LOI	477	26.8	67.7	60.5	1.417	1.024	1.308	0.915	14.4	1899	34.8	2948	2.015	1.892	0.987
	LOI	495	38.6	82.1	53	1.55	1.175	1.475	1.125	17.7	2103	25	2500	2.461	2.313	1.47
	LOI	483	32.6	81.8	60.1	1.438	0.903	1.382	0.846	3	867	7.2	1337	1.885	1.588	0.915
	LOI	467	60	80	24.6	1.4	1.15	1.45	1.15	2.5	784	6.9	1314	1.851	1.62
	LOI	529	28.6	66.6	57	1.5	0.937	1.417	1.024	2.6	798	8	1410	2.015	1.785	0.879
	LOI	502	30.6	74	58.7	1.4	0.95	1.4	1	3.7	956	9.9	1573	2.131	1.851	0.917
	LOI	445	61	104	41.5	1.467	1.1	1.27	0.903	2.6	810	7.2	1339	2	1.87	0.95
Group	Wild_Type	590	24.7	66.4	62.8	1.395	0.904	1.3	0.894	2.6	811	6.6	1285	1.597	1.355	0.763
16 month	Wild_Type	566	32.4	86.5	62.6	1.362	0.872	1.351	0.915	2.9	845	6.6	1284	1.888	1.62	0.8
	Wild_Type	525	30.1	83.2	63.9	1.373	0.915	1.308	0.883	2	708	5.4	1165	1.723	1.554	0.85
	Wild_Type	595	29.4	74.6	60.5	1.384	0.828	1.275	0.806	1.7	659	4.4	1043	1.445	1.27	0.7
	Wild_Type	459	27.9	71.7	61.1	1.417	0.894	1.308	0.857	3.4	916	7.3	1348	1.606	1.355	0.745
	Wild_Type	552	31.5	77	59	1.406	0.937	1.351	0.937	2	702	4.9	1111	1.732	1.526	0.736
	Wild_Type	598	22.8	64.1	64.4	1.444	0.959	1.379	1.003	3.4	923	7.4	1356	1.79	1.569	0.7
	Wild_Type	416	29.5	67.8	61	1.438	0.937	1.4	0.937	1.2	555	2.8	839	1.714	1.49	0.754
	Wild_Type	518	34.4	86.8	60.4	1.395	0.937	1.384	0.937	2	707	4.6	1069	1.662	1.431	0.888
	Wild_Type
	Wild_Type	467	20	64.1	69	1.375	0.875	1.375	0.875	1.8	675	4.6	1077	1.827	1.608	0.84
	LOI	572	52.1	92.2	43.5	1.625	1.16	1.375	1.075	2.6	814	7.1	1332	1.997	1.711	0.95
	LOI	616	43.5	79.2	45.1	1.351	0.948	1.329	0.97	3.9	991	9.6	1553	2.199	2.01	0.924
	LOI	469	39.4	79.1	50.2	1.4	1	1.375	1	6.5	1269	18.3	2141	2.107	1.985	0.992
	LOI	585	45.1	83	45.6	1.7	1.28	1.504	1.27	11.4	1687	35	2963	2.4	2.277	1.346
	LOI	479	45.2	86	47.3	1.5	1.06	1.488	1.1	2.4	775	5.8	1205	2.083	1.851	1.096
	LOI
	LOI	558	47.2	99	52	1.5	1.025	1.375	1.025	2.5	796	7.1	1336	2.01	1.9	0.95
	LOI	520	42	105	60	1.406	0.975	1.381	0.975	3.3	910	7.8	1396	2.18	1.997	0.987
	LOI	505	53	100	46.8	1.459	1.025	1.314	1.025	3	859	7.5	1366	2.058	1.888	0.938
	LOI	556	51.7	98	47.2	1.706	1.255	1.622	1.283	8.9	1492	21.1	2295	3.2	3.031	1.631
