# Supplementary figures and images for: Cardiac pathologies in mouse loss of imprinting models are due to misexpression of H19 long noncoding RNA
Source: eLife journal article supplement (doi:10.7554/elife.67250), 2021-08-17

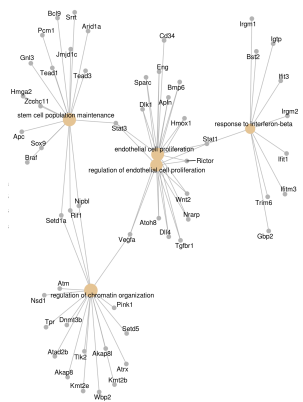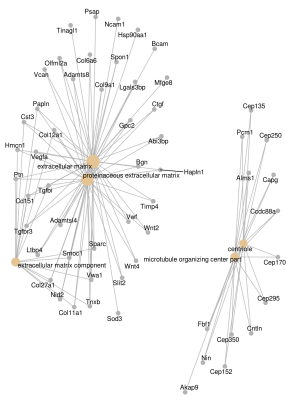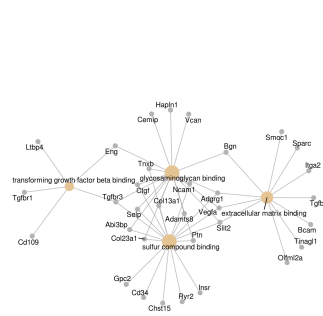

Supplement: supp [file elife-67250-supp-v1.zip]

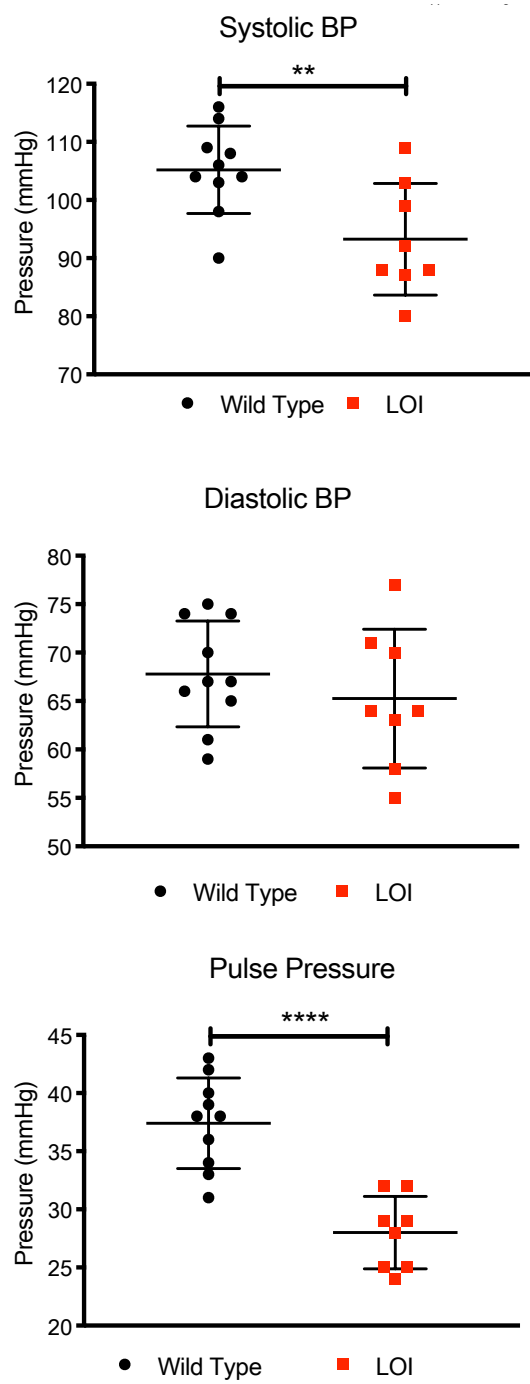

Supplement: supp [file elife-67250-supp-v1.zip]

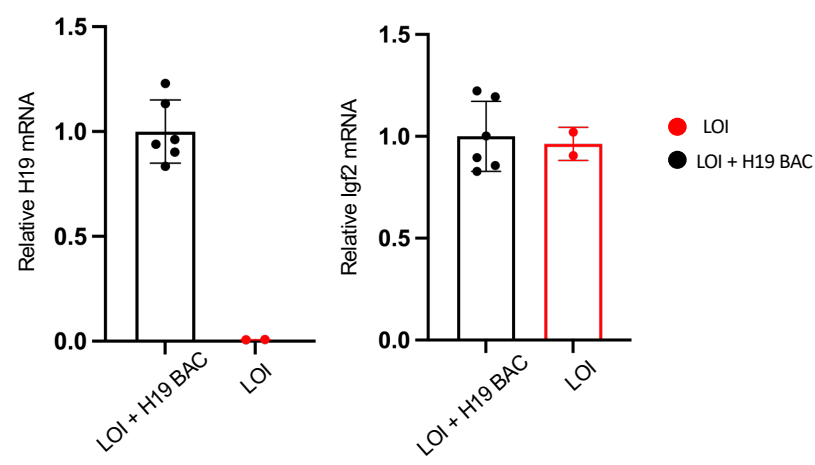

Supplement: supp [file elife-67250-supp-v1.zip]

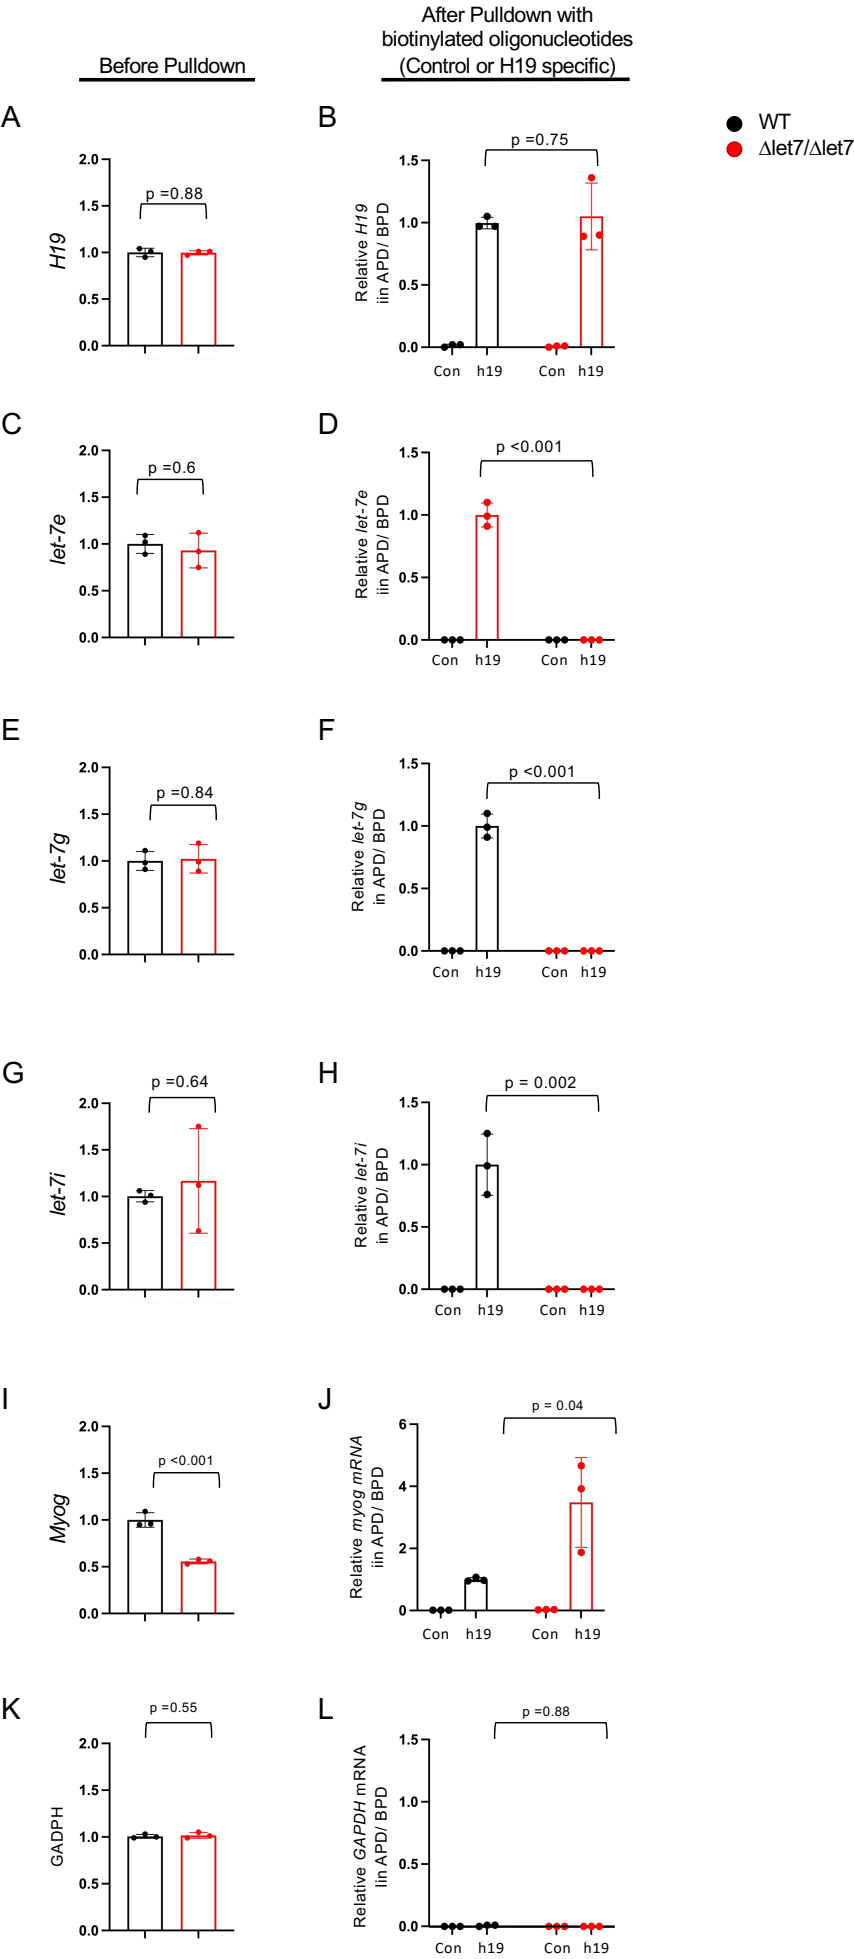

Supplement: supp [file elife-67250-supp-v1.zip]

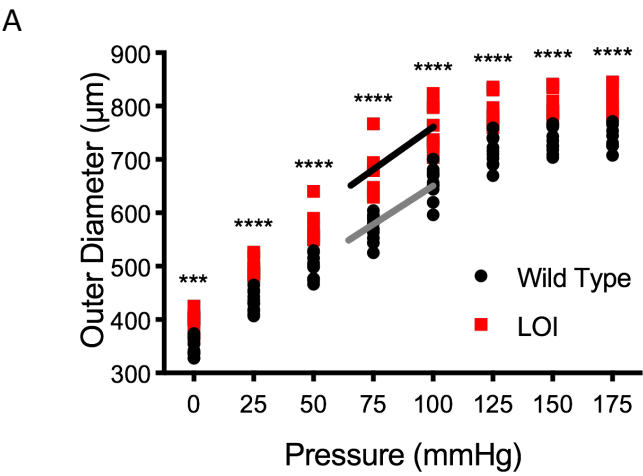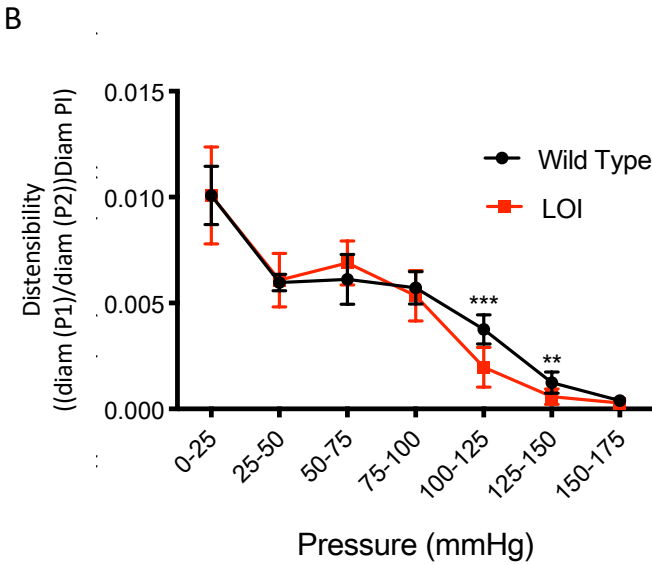

Supplement: supp [file elife-67250-supp-v1.zip]

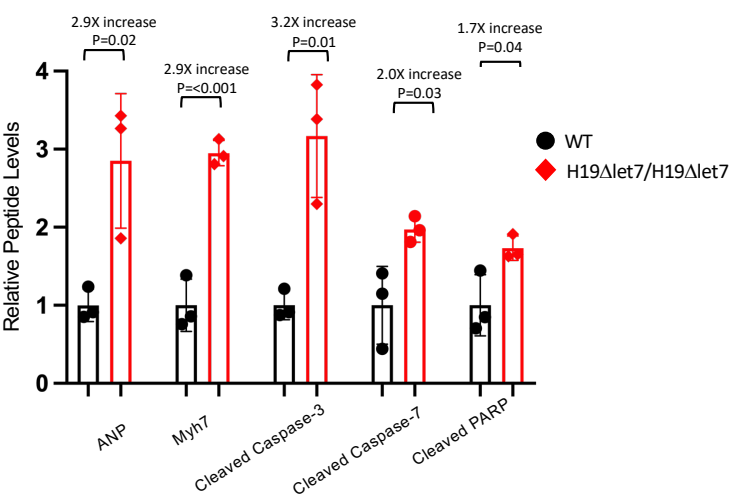

Supplement: supp [file elife-67250-supp-v1.zip]

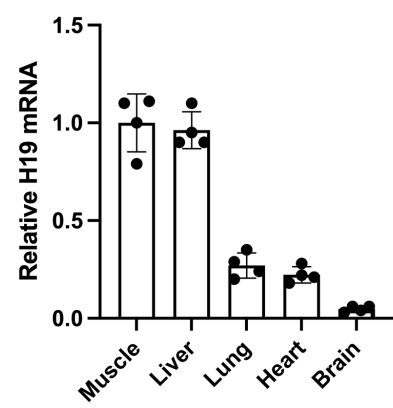

Supplement: supp [file elife-67250-supp-v1.zip]

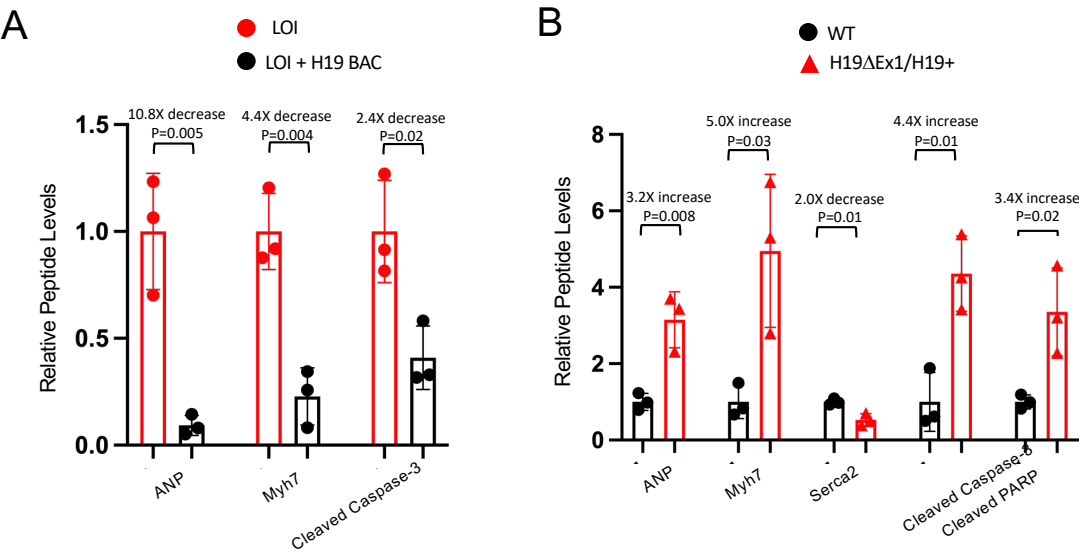

Supplement: supp [file elife-67250-supp-v1.zip]

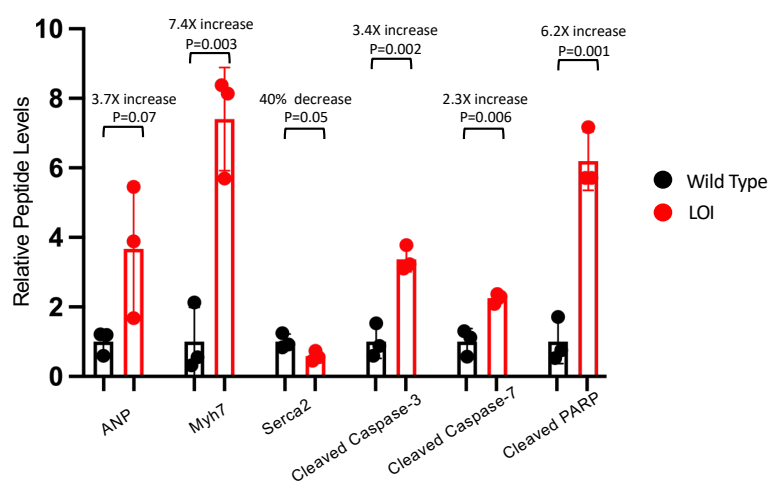

Supplement: supp [file elife-67250-supp-v1.zip]

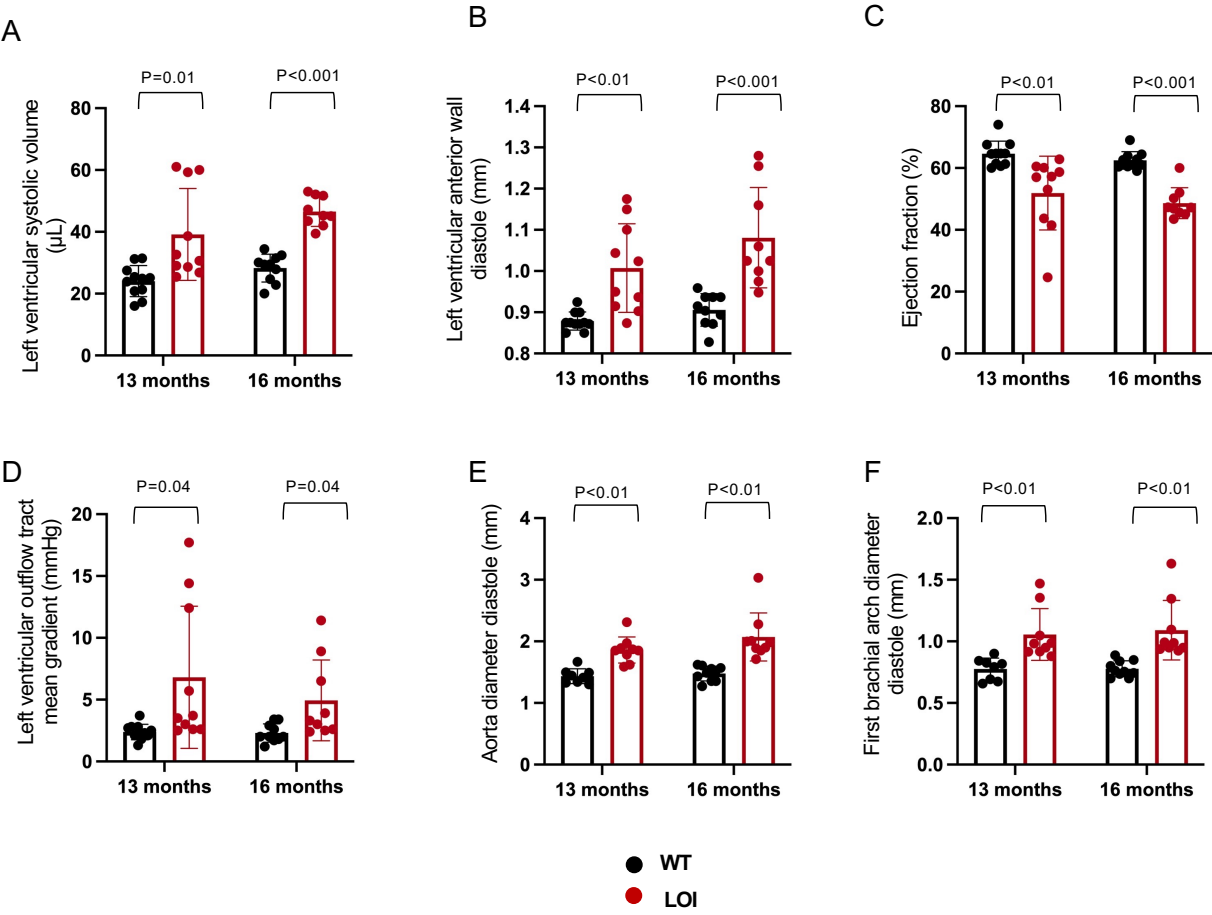

Supplement: supp [file elife-67250-supp-v1.zip]

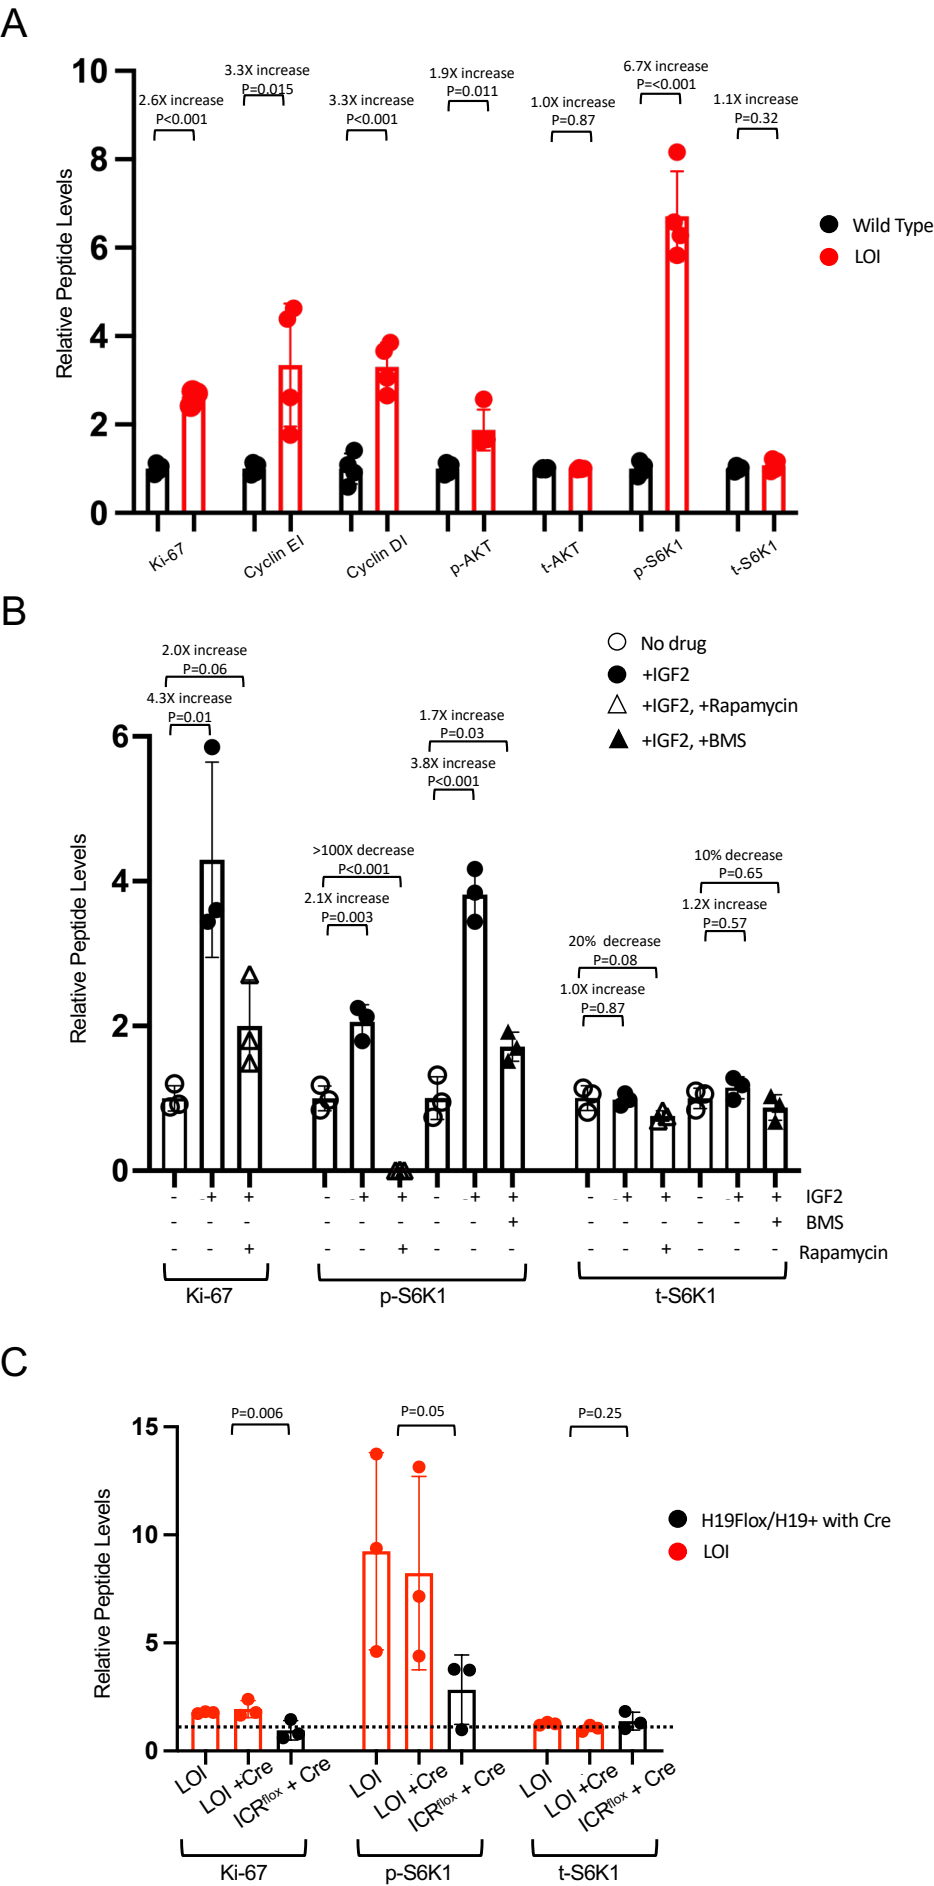

Supplement: supp [file elife-67250-supp-v1.zip]

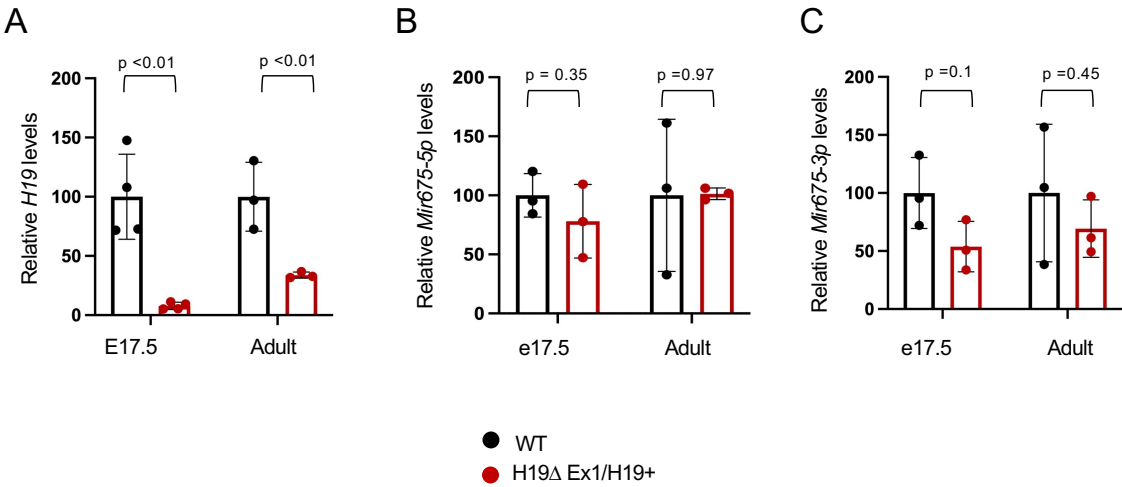

Supplement: supp [file elife-67250-supp-v1.zip]
